# Supplementary material
Source: MDPI journal article supplement (https://www.mdpi.com/2072-4292/13/18/3603)
Supplement: s1 [file s1]

1. Added [jsalasr@ipn.mx](mailto:jsalasr@ipn.mx) (J.S.);
2. Added address for INEGI
3. Please leave italics. Change first letters to uppercase (Leave No One Behind)
4. We do not know the Academic Editor
5. Figure 1 is now mentioned in the text. Thanks!
6. Figure 1 looks fine to me in pdf
7. Figure 4 is now mentioned in the text. Thanks!
8. Switched places between Figure 2 and Figure 3.
9. Figure 3 (previously Figure 2) now includes mention to subfigures (a)-(o) in the caption.
10. The y-axis in Figure 2 (previously Figure 3) is now using scientific notation
11. Bold has been removed from the architectures' names
12. Caption of figure 5: accessed on August 8, 2021
13. Table 1. Bold signals best results. Caption modified.
14. Reference to Supplementary Materials included.
15. url added to our world in data
16. bibliography fixed whenever possible
17. We do not know why the words cardinality and deepwise are highlighted
18. "The next section, describes an approach" comma removed
19. "and a CNN is described Section 3 describes" dot added.
20. "and SW2 (2080-2350 nm). Landsat-7 bands" dot removed
21. "To train a CNN, we first select an image dataset with the same positive and negative samples is selected" -> "To train a CNN, first an image dataset with the same positive and negative samples is selected".
